# Supplementary material for: Résolution « spontanée » de deux pneumopathies sévères au méthotrexate
Source: Royal Society of Chemistry journal article supplement (doi:10.1039/c4tb02106a), 2008-02-22
Supplement: c4tb02106a1.pdf [file c4tb02106a1.pdf]

## Supplementary data

### Diol glycidyl ether-bridged low molecular weight PEI as potential gene delivery vehicles

Qian Guo,<sup>a</sup> Yan-Hong Liu,<sup>a</sup> Miao-Miao Xun,<sup>a</sup> Ji Zhang\*,<sup>a</sup> Zheng Huang,<sup>a</sup> Xue-Dong Zhou\*<sup>b</sup>  
and Xiao-Qi Yu\*<sup>a</sup>

<sup>a</sup>Key Laboratory of Green Chemistry and Technology (Ministry of Education), College of Chemistry, Sichuan University, Chengdu 610064, PR China

<sup>b</sup>State Key Laboratory of Oral Diseases, Sichuan University, Chengdu 610041, PR China. E-mail:

\*Corresponding authors: xqyu@scu.edu.cn (X.-Q. Yu); jzhang@scu.edu.cn (J. Zhang); zhouxd@scu.edu.cn (X.-D. Zhou)

**Table S1** The IC<sub>50</sub> values of polyplexes calculated by a Cell Counting Kit-8.

| polyplexes | HEK293 cells                   | Hela cells                    |
|------------|--------------------------------|-------------------------------|
|            | IC <sub>50</sub> value (μg/μL) | IC <sub>50</sub> value(μg/μL) |
| <b>P1</b>  | 1.80 × 10 <sup>-2</sup>        | 2.40 × 10 <sup>-2</sup>       |
| <b>P2</b>  | 1.16 × 10 <sup>-2</sup>        | 1.20 × 10 <sup>-2</sup>       |
| <b>P3</b>  | 1.10 × 10 <sup>-2</sup>        | 1.50 × 10 <sup>-2</sup>       |
| <b>P4</b>  | 1.30 × 10 <sup>-2</sup>        | 1.16 × 10 <sup>-2</sup>       |
| <b>P5</b>  | 1.18 × 10 <sup>-2</sup>        | 1.44 × 10 <sup>-2</sup>       |
| PEI        | 0.60 × 10 <sup>-2</sup>        | 0.60 × 10 <sup>-2</sup>       |

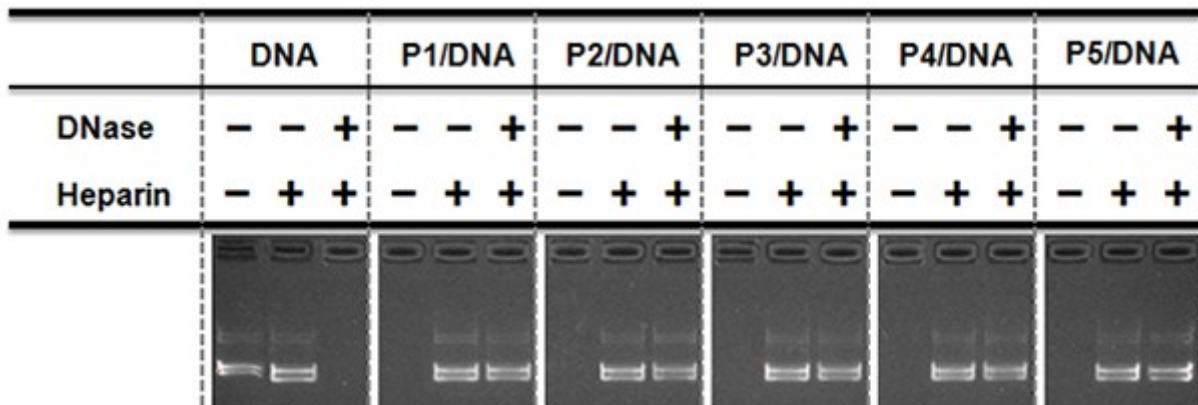

**Fig. S1** Agarose gel electrophoresis of **P1~P5**/DNA polyplexes at mass ratio of 3.2 incubated with heparin and/or DNase (-: without addition, +: with addition).

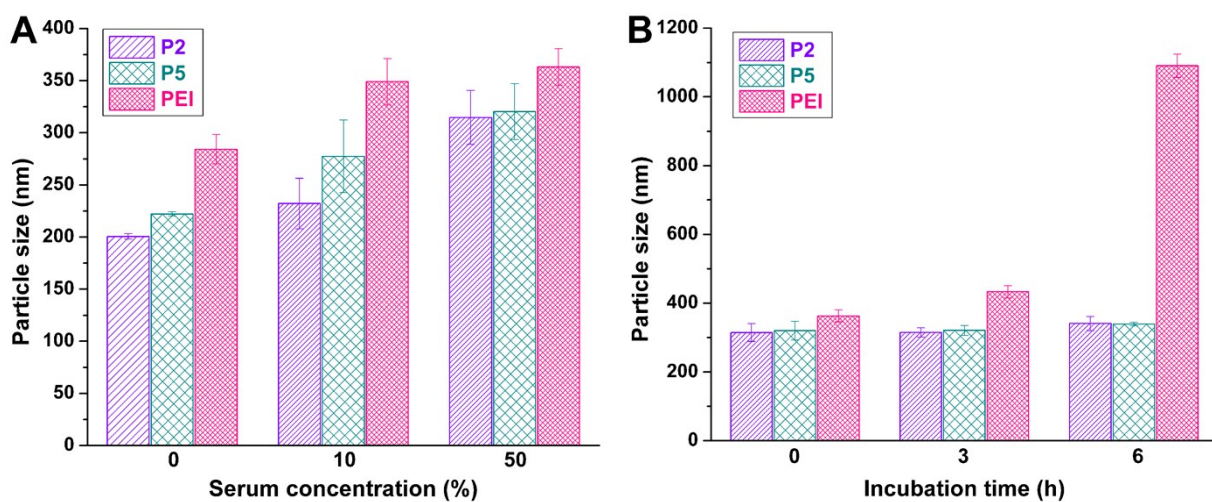

**Fig. S2** (A) Sizes of polyplexes under different FBS concentrations. (B) Sizes of polyplexes in 50% FBS solution at different time intervals. Polyplexes derived from **P2**, **P5** for w/w=6.4 and PEI for w/w=1.4. Data represent mean  $\pm$  SD (n = 3).

**A** serum free:

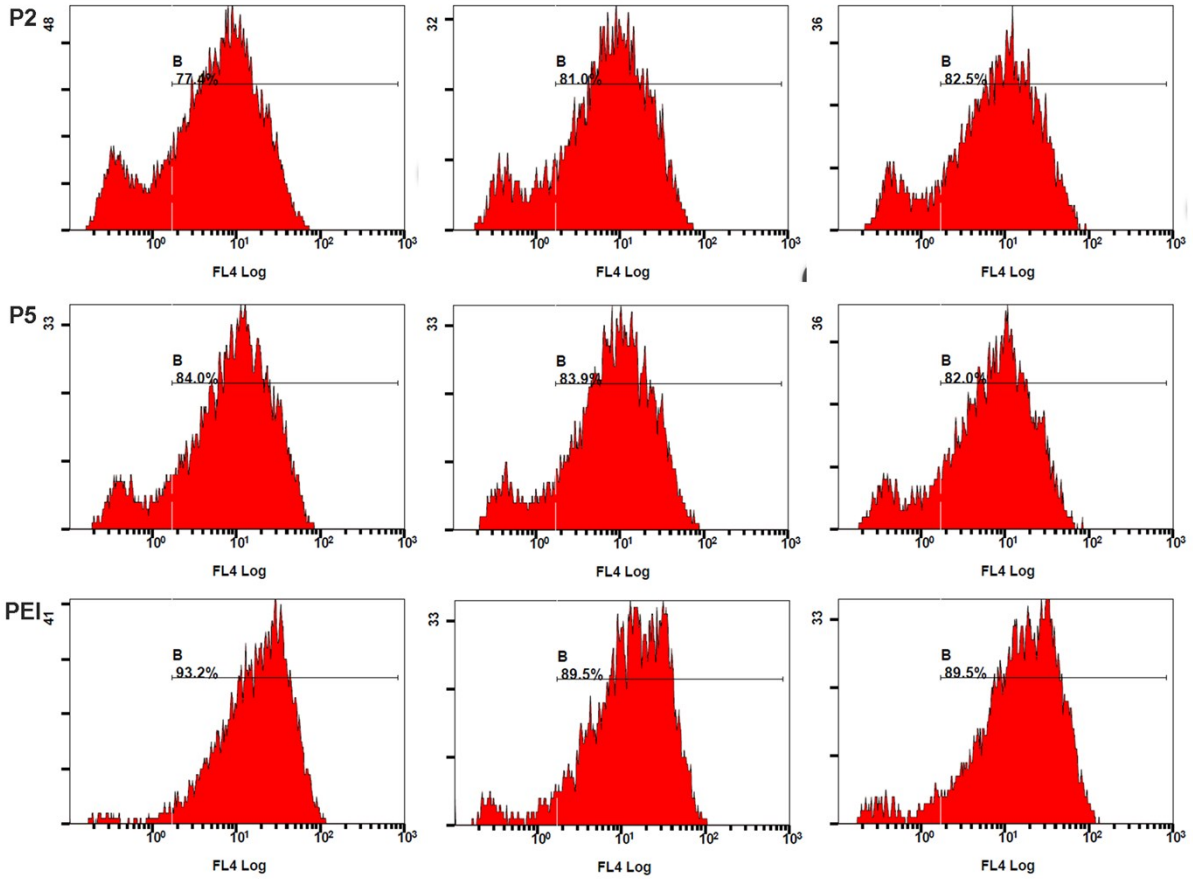

with serum:

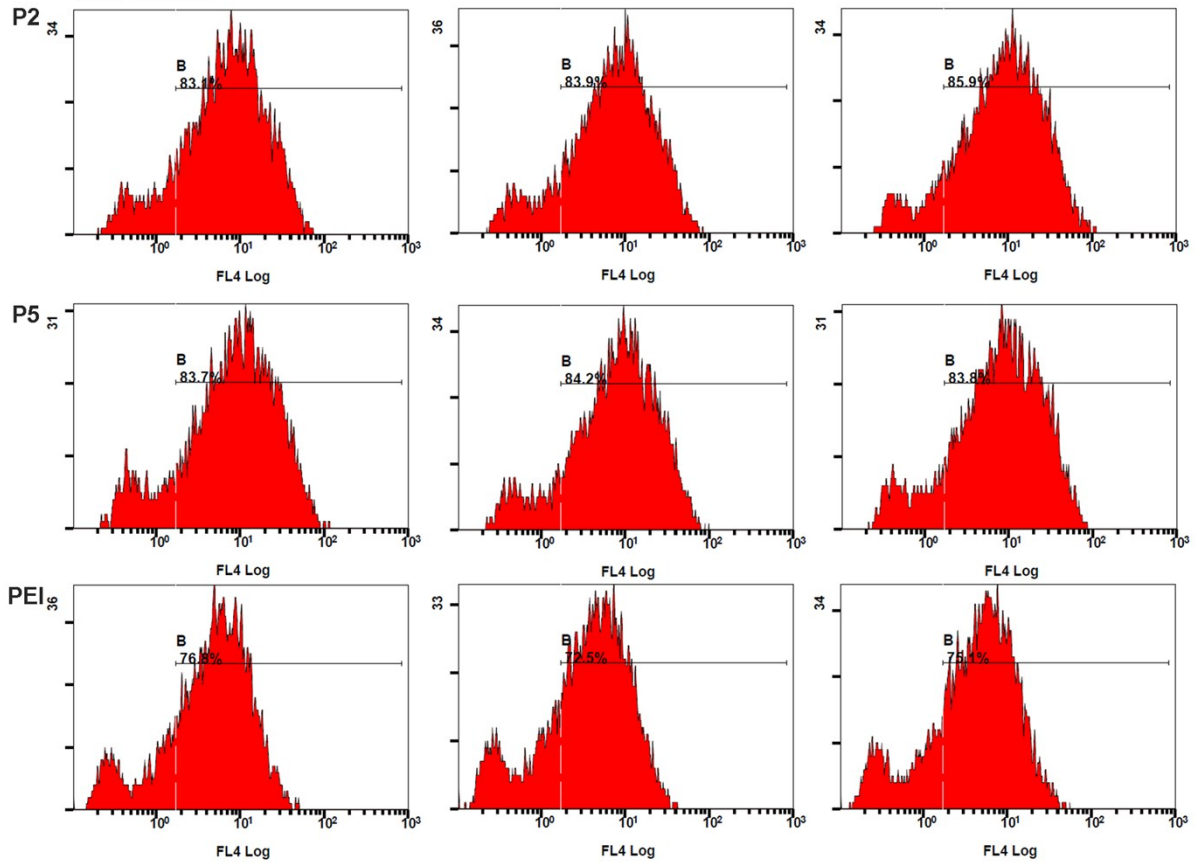

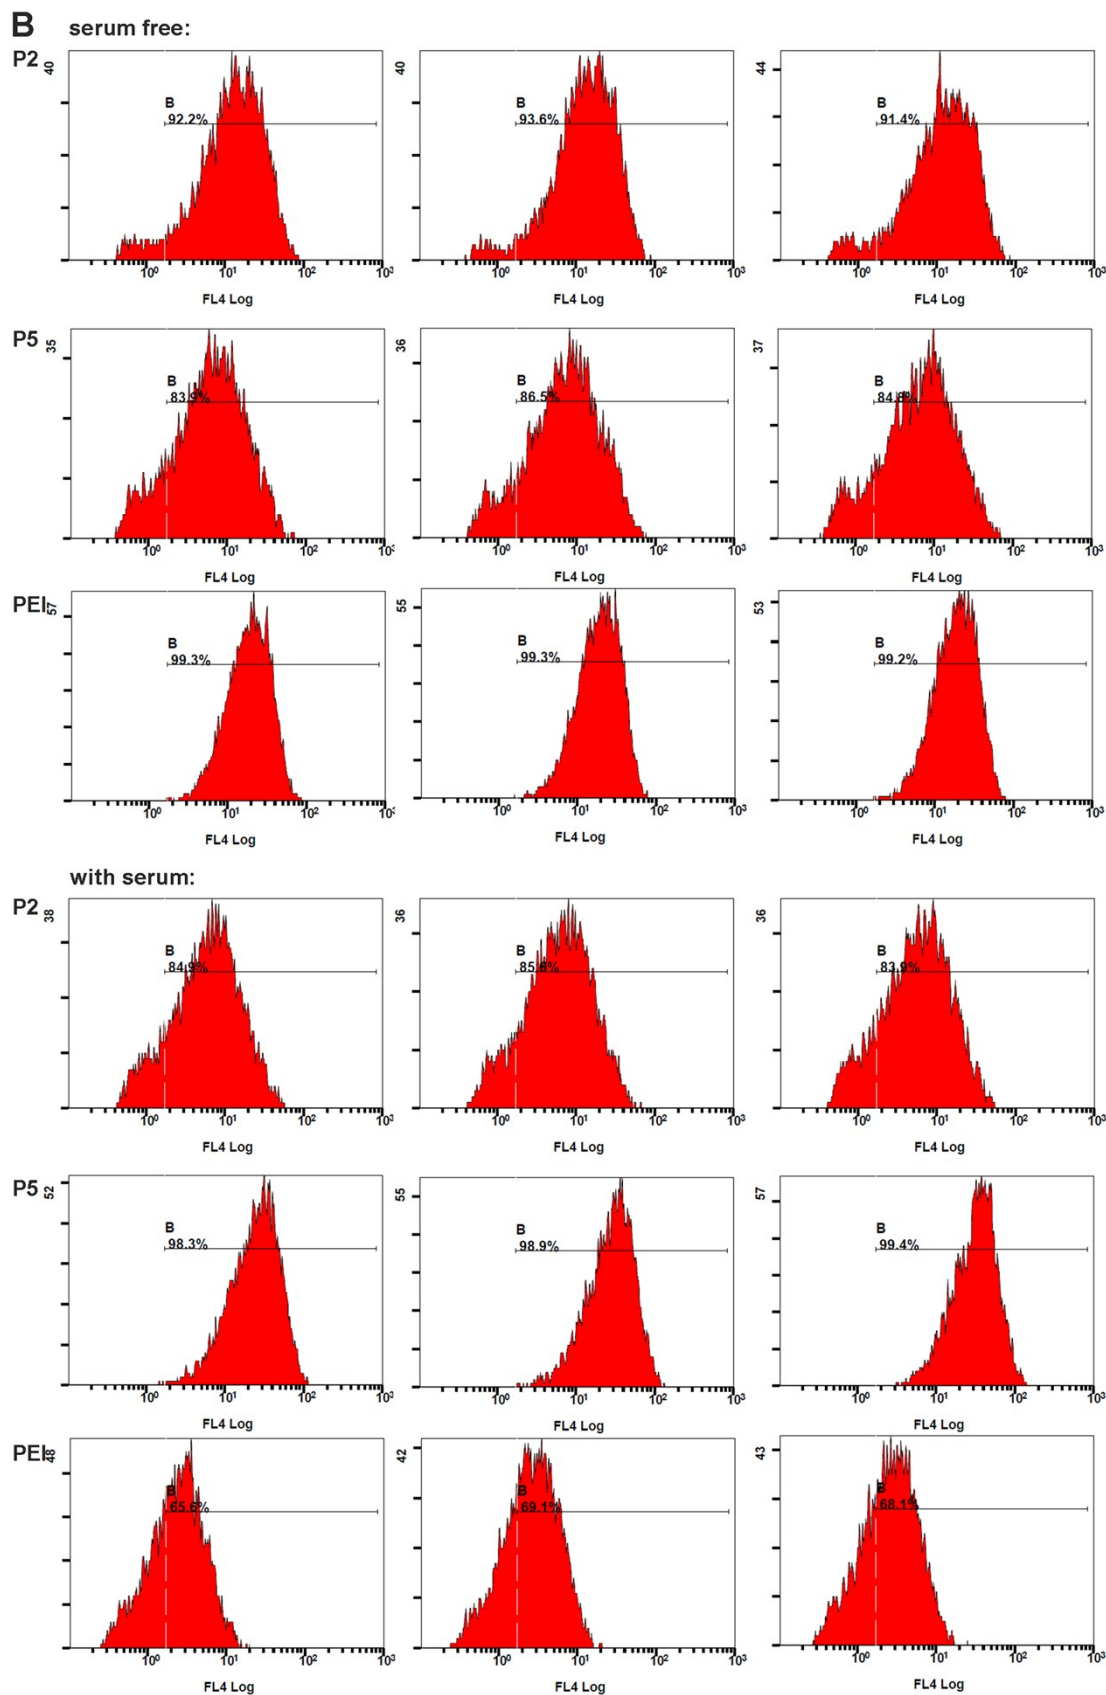

**Fig. S3** The detailed cellular uptake data of flow cytometry analysis by using Cy5-labelled polyplexes. A: polyplexes at optimal mass ratios in HEK 293 cells; B: polyplexes at optimal mass ratios in Hela cells.

<sup>1</sup>H NMR spectra of the polymers P1~P5:

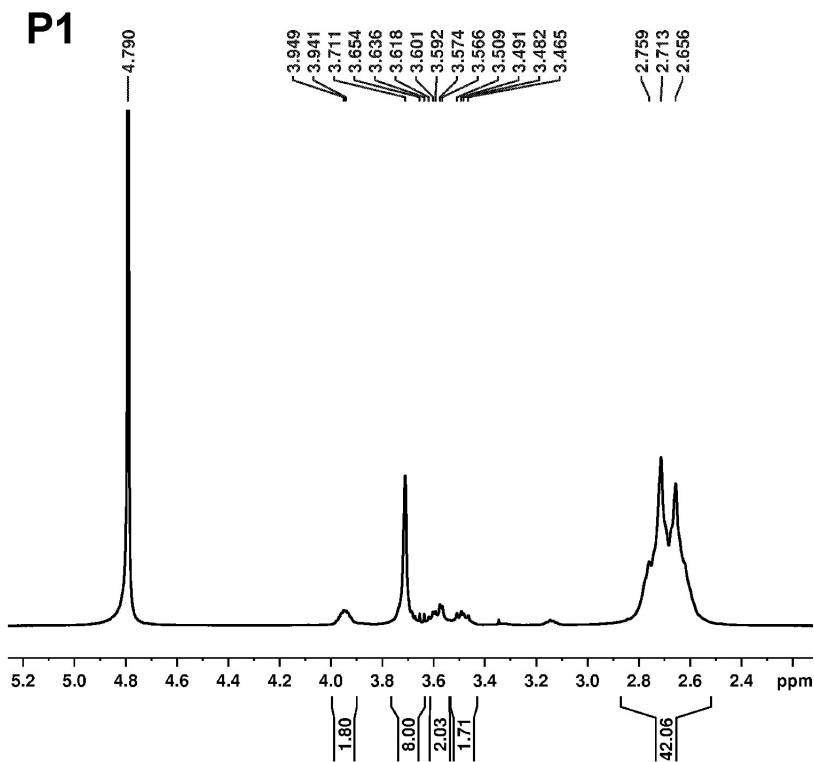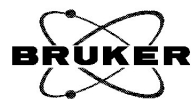

NAME YXQ-20140528-GQ-1  
EXPNO 1  
PROCNO 1  
Date\_ 20140529  
Time 15.12  
INSTRUM spect  
PROBHD 5 mm PABBO BB/  
PULPROG zg30  
TD 65536  
SOLVENT D2O  
NS 16  
DS 2  
SWH 8012.820 Hz  
FIDRES 0.122266 Hz  
AQ 4.0894966 sec  
RG 32.53  
DW 62.400 usec  
DE 6.50 usec  
TE 298.0 K  
D1 1.00000000 sec  
TD0 1

===== CHANNEL f1 =====  
SFO1 400.1328009 MHz  
NUC1 1H  
P1 9.80 usec  
SI 65536  
SF 400.1299672 MHz  
WDW EM  
SSB 0  
LB 0.30 Hz  
GB 0  
PC 1.00

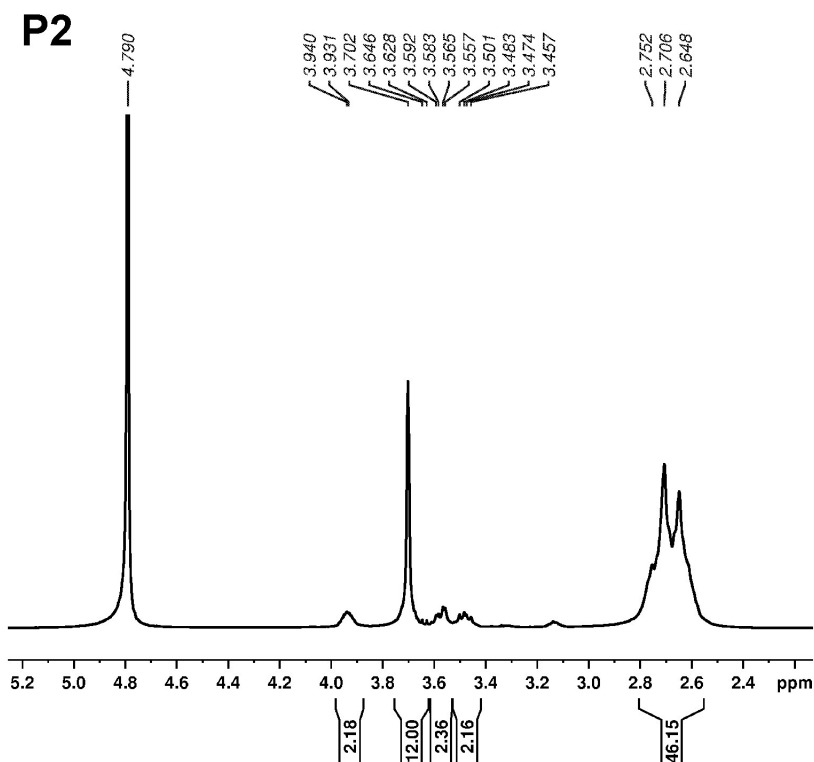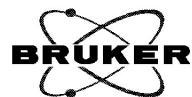

NAME YXQ-20140528-GQ-1  
EXPNO 1  
PROCNO 1  
Date\_ 20140529  
Time 15.16  
INSTRUM spect  
PROBHD 5 mm PABBO BB/  
PULPROG zg30  
TD 65536  
SOLVENT D2O  
NS 16  
DS 2  
SWH 8012.820 Hz  
FIDRES 0.122266 Hz  
AQ 4.0894966 sec  
RG 16.29  
DW 62.400 usec  
DE 6.50 usec  
TE 298.1 K  
D1 1.00000000 sec  
TD0 1

===== CHANNEL f1 =====  
SFO1 400.1328009 MHz  
NUC1 1H  
P1 9.80 usec  
SI 65536  
SF 400.1299681 MHz  
WDW EM  
SSB 0  
LB 0.30 Hz  
GB 0  
PC 1.00

P3

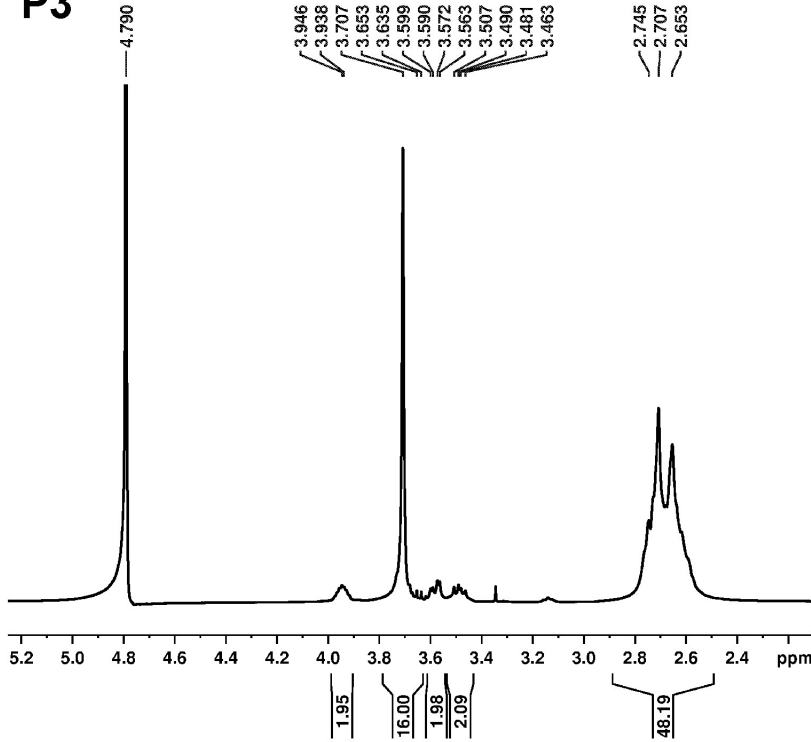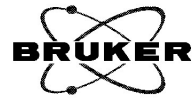

NAME YXQ-20140528-GQ-1  
 EXPNO 1  
 PROCNO 1  
 Date\_ 20140529  
 Time 15.20  
 INSTRUM spect  
 PROBHD 5 mm PABBO BB/  
 PULPROG zg30  
 TD 65536  
 SOLVENT D2O  
 NS 16  
 DS 2  
 SWH 8012.820 Hz  
 FIDRES 0.122266 Hz  
 AQ 4.0894966 sec  
 RG 32.53  
 DW 62.400 usec  
 DE 6.50 usec  
 TE 298.1 K  
 D1 1.00000000 sec  
 TD0 1

===== CHANNEL f1 =====  
 SFO1 400.1328009 MHz  
 NUC1 1H  
 P1 9.80 usec  
 SI 65536  
 SF 400.1299673 MHz  
 WDW EM  
 SSB 0  
 LB 0.30 Hz  
 GB 0  
 PC 1.00

P4

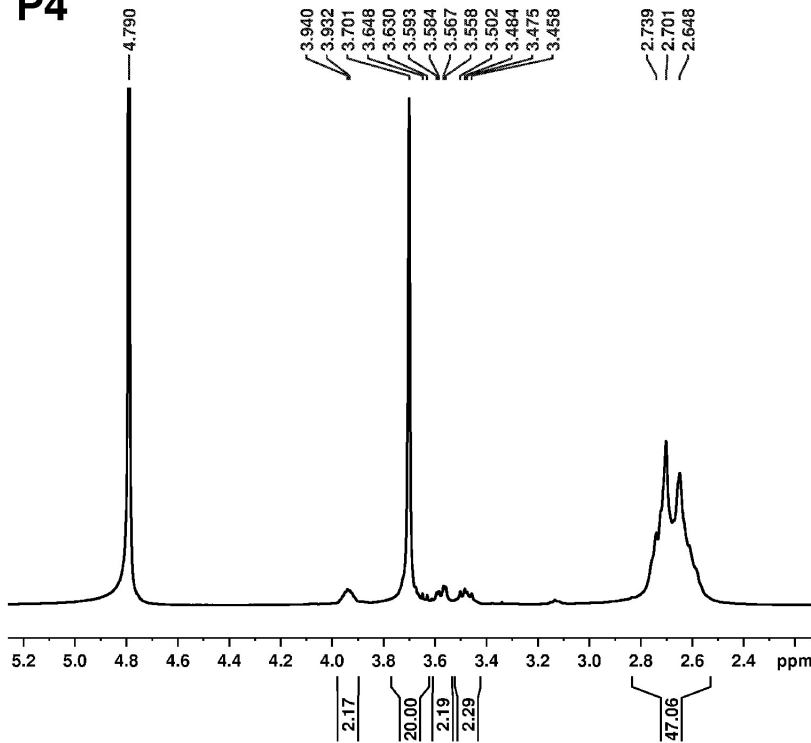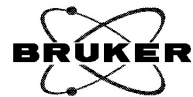

NAME YXQ-20140528-GQ-1  
 EXPNO 1  
 PROCNO 1  
 Date\_ 20140529  
 Time 15.28  
 INSTRUM spect  
 PROBHD 5 mm PABBO BB/  
 PULPROG zg30  
 TD 65536  
 SOLVENT D2O  
 NS 16  
 DS 2  
 SWH 8012.820 Hz  
 FIDRES 0.122266 Hz  
 AQ 4.0894966 sec  
 RG 16.29  
 DW 62.400 usec  
 DE 6.50 usec  
 TE 298.0 K  
 D1 1.00000000 sec  
 TD0 1

===== CHANNEL f1 =====  
 SFO1 400.1328009 MHz  
 NUC1 1H  
 P1 9.80 usec  
 SI 65536  
 SF 400.1299683 MHz  
 WDW EM  
 SSB 0  
 LB 0.30 Hz  
 GB 0  
 PC 1.00

P5

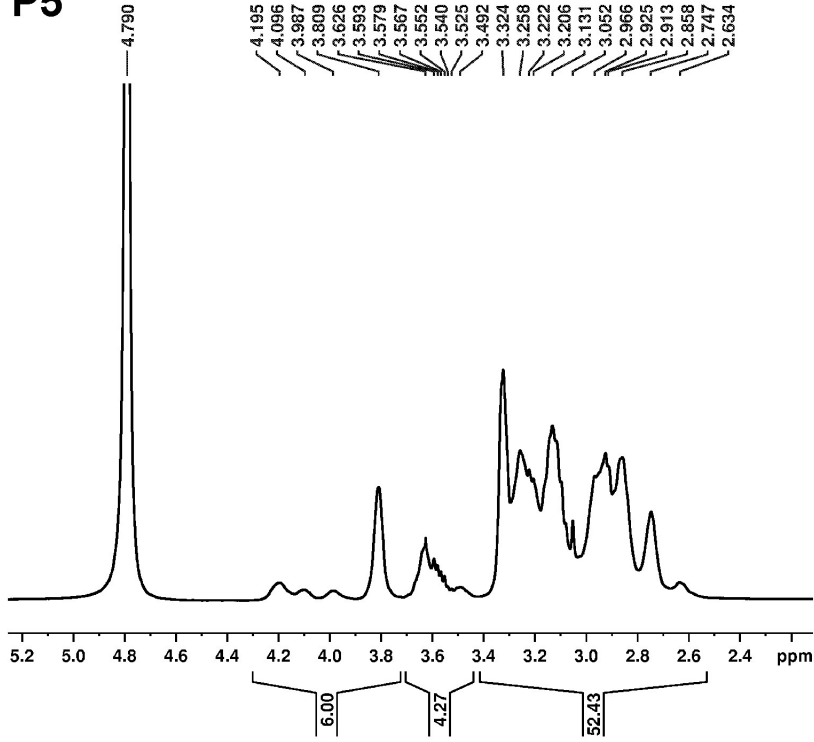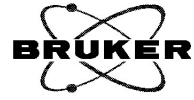

NAME YXQ-20140910-GQ-1  
EXPNO 1  
PROCNO 1  
Date\_ 20140910  
Time 21.16  
INSTRUM spect  
PROBHD 5 mm PABBO BB/  
PULPROG zg30  
TD 65536  
SOLVENT D2O  
NS 16  
DS 2  
SWH 8012.820 Hz  
FIDRES 0.122266 Hz  
AQ 4.0894956 sec  
RC 19.64  
DW 62.400 usec  
DE 6.50 usec  
TE 295.7 K  
D1 1.00000000 sec  
TD0 1

===== CHANNEL f1 =====  
SFO1 400.1328009 MHz  
NUC1 1H  
P1 9.75 usec  
SI 65536  
SF 400.1299646 MHz  
WDW EM  
SSB 0  
LB 0.30 Hz  
GB 0  
PC 1.00
